# Supplementary material for: Exploring global surface temperature pattern scaling methodologies and assumptions from a CMIP5 model ensemble
Source: Copernicus journal article supplement (doi:10.5194/gmd-2016-170), 2016-07-29
Supplement: Supplementary file 1 [file gmd-2016-170-supplement.pdf]

## **1 Supplementary Figures**

1. Figures S1 to S4

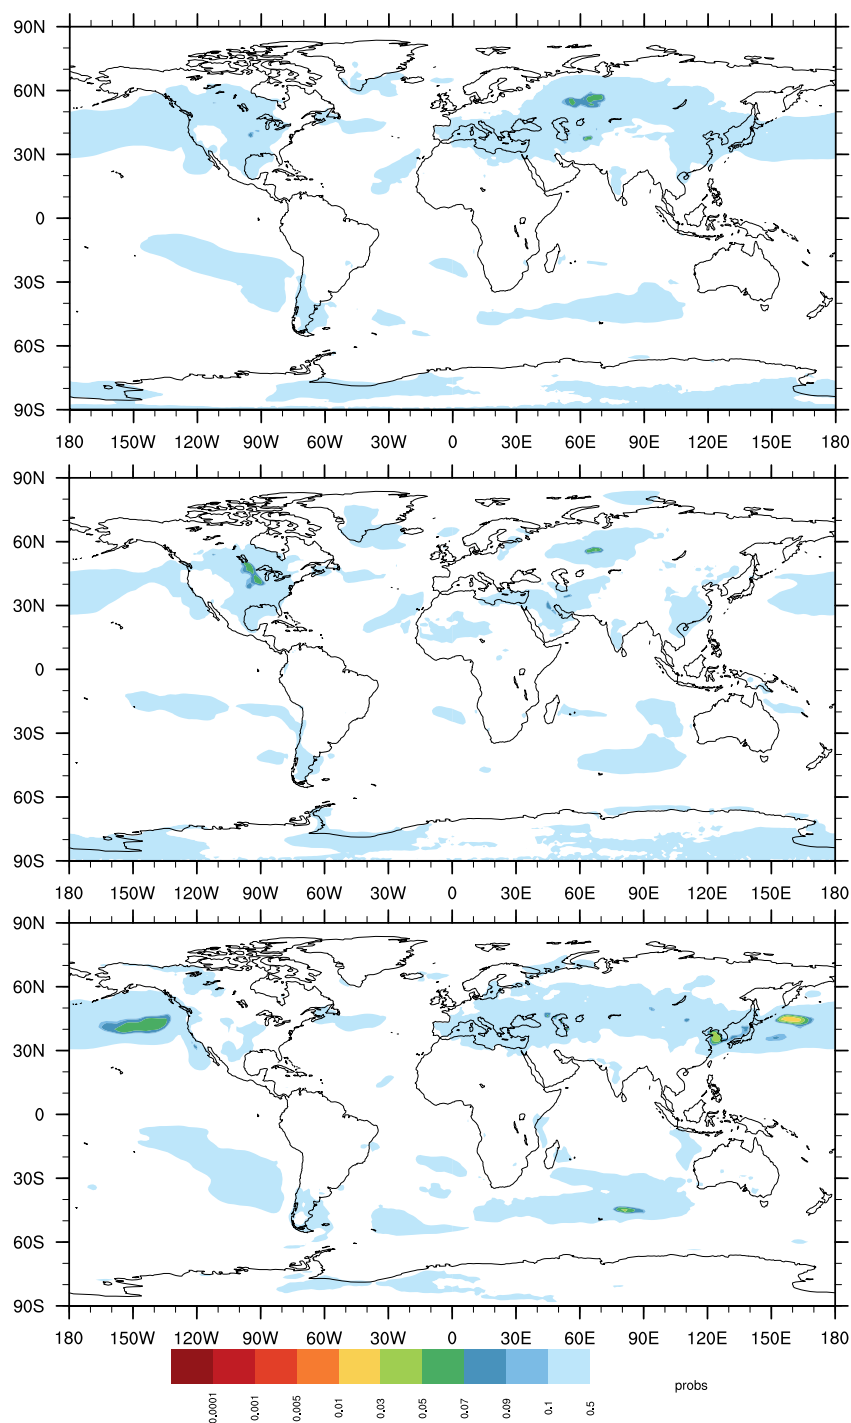

**Figure 1.** Model ensemble two-tailed t-test probability significance between the patterns generated from late 19<sup>th</sup> (1861-1890) Century and late 20<sup>th</sup> (1971-2000) Century epochs.

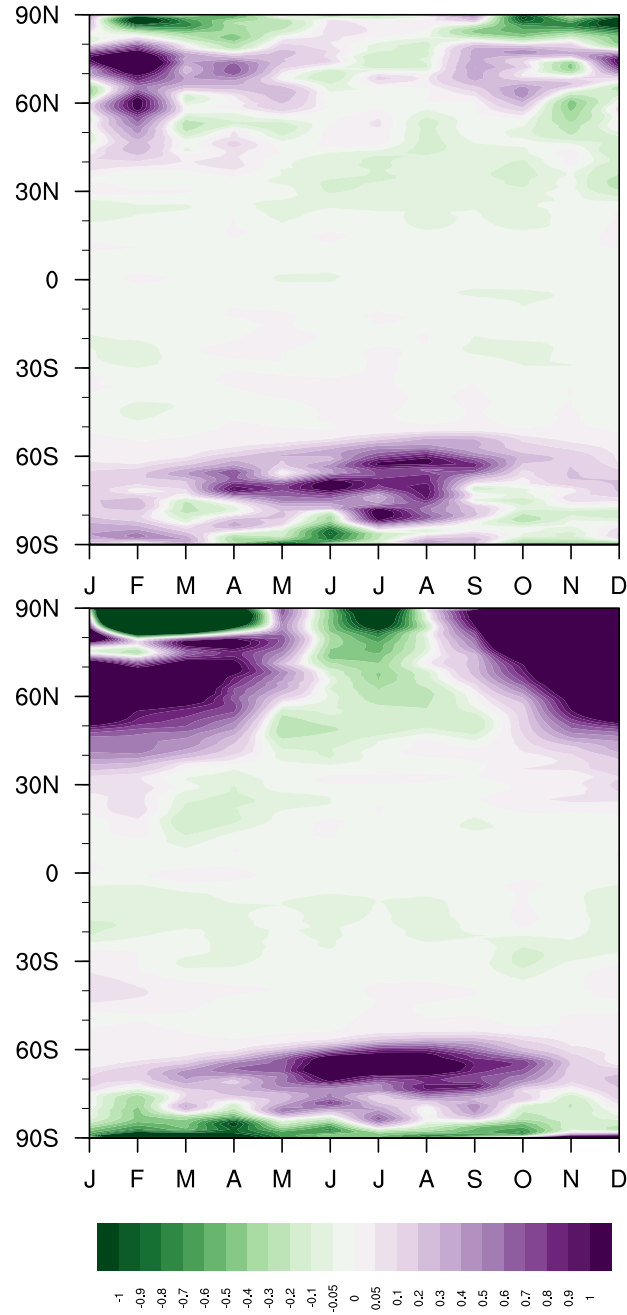

**Figure 2.** Hovmoller (latitude-month) diagram ensemble mean global air temperature variance difference between the late 19<sup>th</sup> (1861-1890) and late 20<sup>th</sup> (1971-2000) Century (top) and mid 21<sup>st</sup> (2041-2070) and late 21<sup>st</sup> (2071-2100) Century (bottom).

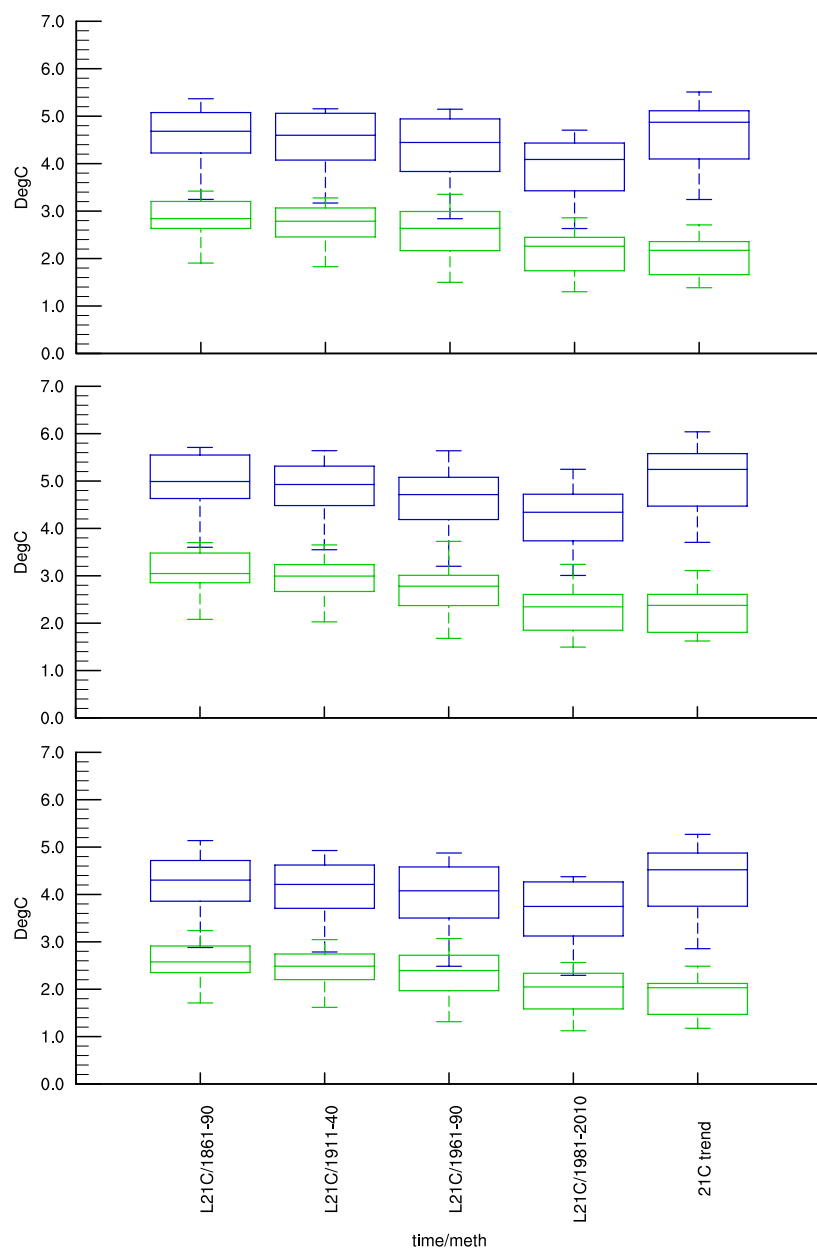

**Figure 3.** Box plots of model ensemble global air temperature (degree Celsius) epoch differences and 21<sup>st</sup> Century trend for rcp8.5 (blue) and rcp4.5 (green) for annual (top), DJF (middle), and JJA (bottom) averages.

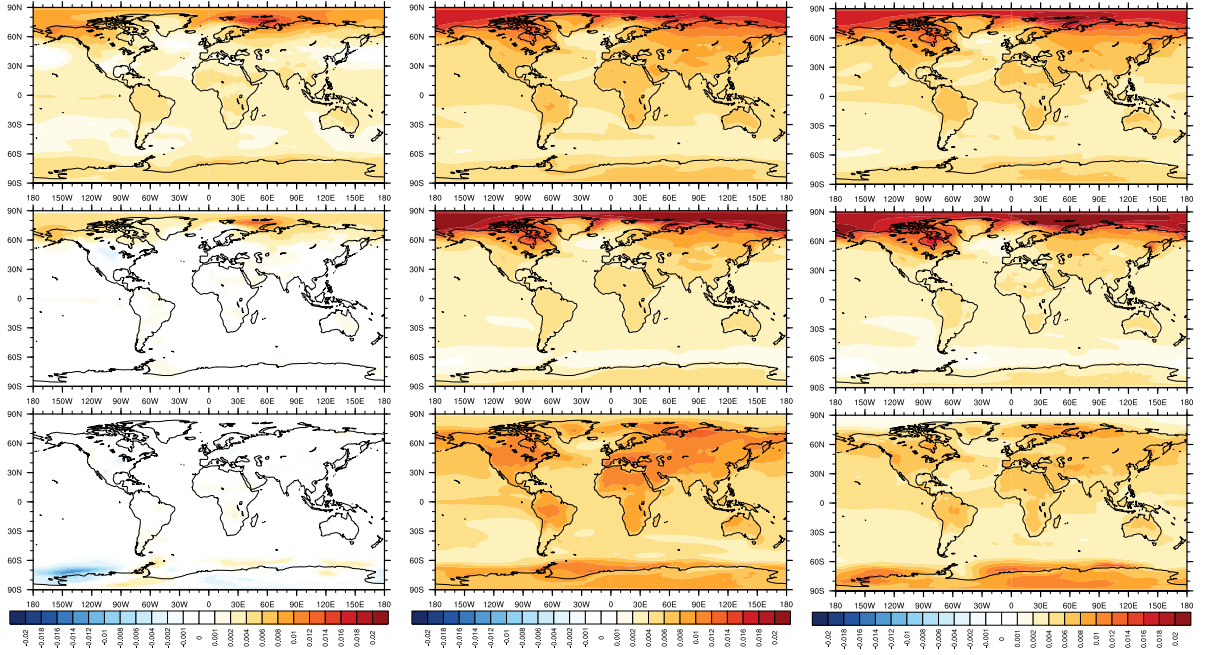

**Figure 4.** EOF 1 of model ensemble mean global air temperature for historical period (1861-2000, left column), rcp8.5 (2006-2100, middle column), and rcp4.5 (2006-2100, right column) for annual mean (top row), boreal winter (middle row), and boreal summer (bottom row).
